# Supplementary material for: Sustained release of chlorogenic acid-loaded nanomicelles alleviates bone loss in mouse periodontitis
Source: Royal Society of Chemistry journal article supplement (doi:10.1039/d2bm01099b), 2022-01-01

## Supplementary material

### Sustained release of chlorogenic acid-loaded nanomicelles alleviates bone loss in mouse periodontitis

Han Li, <sup>‡a</sup> Jiming Xu, <sup>‡b</sup> Jun-Feng Hu, <sup>b</sup> Qing-Yun Hu, <sup>a</sup> Xiaolin Fang, <sup>a</sup> Zhi-Jun Sun, <sup>a</sup> Zhigang Xu <sup>\*b, c</sup> and Lu Zhang <sup>\*a</sup>

<sup>a</sup> The State Key Laboratory Breeding Base of Basic Science of Stomatology (Hubei-MOST) & Key Laboratory of Oral Biomedicine of Ministry of Education, School & Hospital of Stomatology, Wuhan University, Wuhan 430079, China.

<sup>b</sup> School of Materials and Energy & Chongqing Key Laboratory of Soft-Matter Material Chemistry and Function Manufacturing, Southwest University, Chongqing, 400715, China.

<sup>c</sup> Key Laboratory of Laser Technology and Optoelectronic Functional Materials of Hainan Province, College of Chemistry and Chemical Engineering, Hainan Normal University, Haikou 571158, China.  
Corresponding Authors

\*E-mail: zgxu@swu.edu.cn (Z.X.).

\*E-mail: luzhang2012@whu.edu.cn (L.Z.).

<sup>‡</sup> These authors contributed equally to this work.

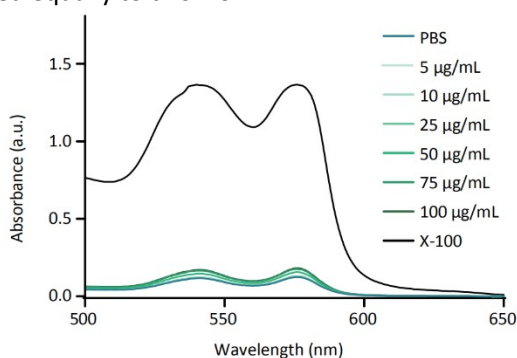

**Figure S1.** UV-vis spectra absorption of the blood supernatants incubated with PBS, 1% Triton X-100, and different concentrations of CGA-PLGA@PVP.

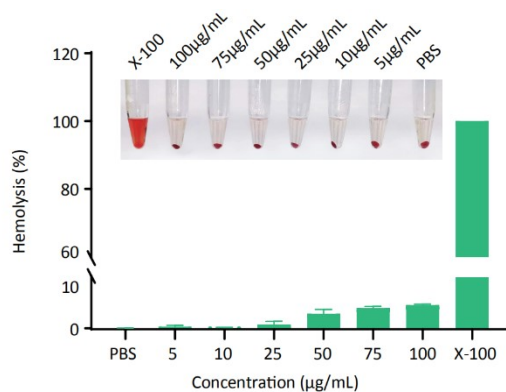

**Figure S2.** Hemolysis rates with inset photographs of the centrifugal supernatants of samples.

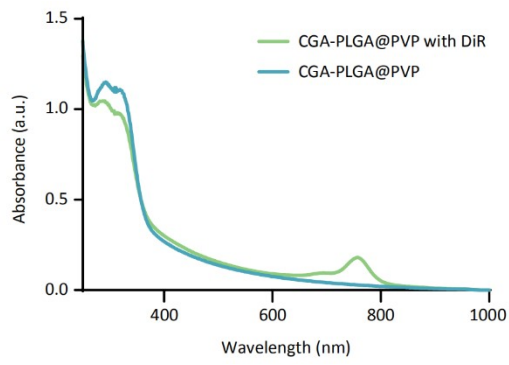

Figure S3. UV absorption spectra of CGA-PLGA@PVP with DiR and CGA-PLGA@PVP.

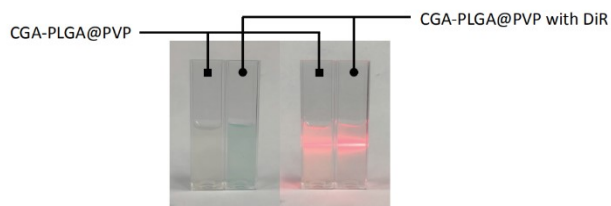

Figure S4. The photographs of CGA-PLGA@PVP with DiR and CGA-PLGA@PVP.

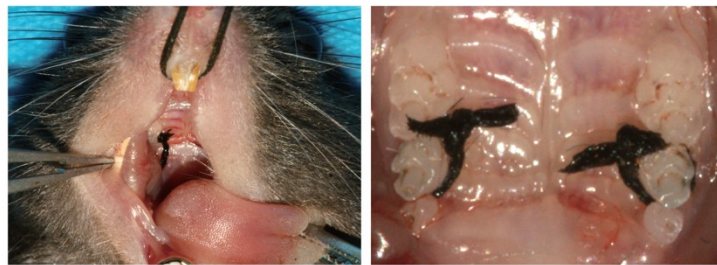

Figure S5. Schematic diagram of ligature-induced periodontitis in mice.

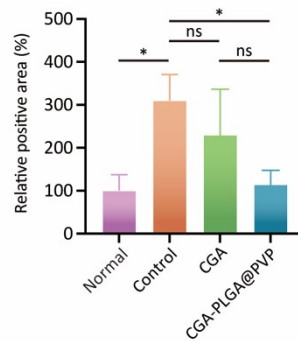

Figure S6. TNF- $\alpha$  levels in gingiva tissues were assessed.

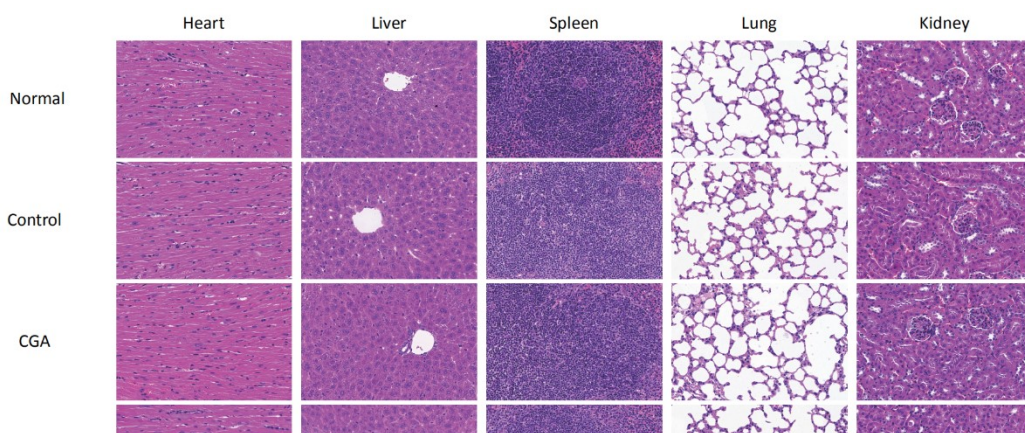

Supplement: d2bm01099b1.pdf [file d2bm01099b1.pdf]
